# Supplementary material for: Photocatalytic hydrogen production from water in self-assembled supramolecular iridium–cobalt systems
Source: Royal Society of Chemistry journal article supplement (doi:10.1039/c0cc02486d), 2010-01-01
Supplement: c0cc02486d.pdf [file c0cc02486d.pdf]

*Electronic Supporting Information*

## **Photocatalytic hydrogen production from water in self-assembled supramolecular iridium-cobalt systems**

**Sk. Jasimuddin,<sup>a</sup> Kazunori Fukuju,<sup>a</sup> Joe Otsuki<sup>a</sup> and Ken Sakai<sup>b</sup>**

<sup>a</sup> *College of Science and Technology, Nihon University, 1-8-14 Kanda Surugadai, Chiyoda-ku, Tokyo 101-8308, Japan*

<sup>b</sup> *Department of Chemistry, Faculty of Science, Kyushu University, Hakozaki 6-10-1, Higashi-ku, Fukuoka, 812-8581, Japan*

### **Experimental**

**General experimental information.** Solvents and reagents were of reagent grade and used without further purification.  $[\text{Ir}(\text{ppy})_2\text{Cl}]_2$ ,<sup>1</sup>  $[\text{Ir}(\text{ppy})_2(\text{bpy})](\text{PF}_6)$ ,<sup>2</sup>  $[\text{Co}(\text{bpy})_3](\text{PF}_6)_2$ ,<sup>3</sup> 1,2-bis[4-(4'-methyl-2,2'-bipyridyl)]ethane (L1),<sup>4</sup> 1,3-bis(4'-methyl-2,2'-bipyridyl-4-yl)-2-propanol (L2),<sup>5</sup> 1,2-bis[5-(5'-methyl-2,2'-bipyridyl)]ethane (L3)<sup>4a,5</sup> and bis(2,2'-bipyridin-5-yl)ethyne (L4)<sup>6</sup> were synthesised and purified according to the reported procedures. <sup>1</sup>H-NMR spectra were recorded on a JEOL JNM-ECX400 spectrometer. ESI-HR mass spectra were obtained with an Agilent 1100LC/MSD mass spectrometer. Uv-vis and luminescence data were obtained using Shimadzu UV-2400PC and RF 5300PC spectrophotometer, respectively. Emission decays in the nanosecond time regime were recorded on an Iwatsu DS-4262 digitizing oscilloscope equipped with a Hamamatsu R928 photomultiplier tube. The excitation source was a N<sub>2</sub> laser (337 nm, Usho KEN-1520). The grating monochromator used was a Jobin Vyon H-20 instrument. Data acquisitions were carried out up to 1024 scans. In all the measurements, each sample solution was purged with Ar for at least 15 minutes before the measurement. Electrochemical measurements were carried out with a Hokuto Denko HZ-3000 voltammetric analyzer. The electrochemical cell, maintained under Ar, was equipped with a Pt disk working electrode, a Pt wire counter electrode, and an Ag wire as a pseudo reference electrode. The supporting electrolyte solution was 0.01 M Bu<sub>4</sub>NPF<sub>6</sub> in CH<sub>3</sub>CN. The scan rate was 100 mV/s. Potentials were reported with respect to the internal Fc<sup>+</sup>/Fc couple.

**[Ir-X]<sup>+</sup> (X = L1–L4).** Synthesis of [Ir-X]<sup>+</sup> is exemplified by that of [Ir-L1]<sup>+</sup>. The dimeric Ir(III) complex  $[\text{Ir}(\text{ppy})_2\text{Cl}]_2$  (0.035 g, 0.03 mmol) was dissolved in CH<sub>2</sub>Cl<sub>2</sub> (5 mL) under Ar.

To this solution, L1 (0.034 g, 0.09 mmol) was added. The reaction mixture was refluxed under Ar for 4 h. The solvent was evaporated and the resulting solid was purified by column chromatography on Sephadex LH-20 (eluent CH<sub>3</sub>CN). The second yellow band was collected to give the desired product (0.027 g, 47%).

**[Ir-L1]<sup>+</sup>**. <sup>1</sup>H-NMR (CDCl<sub>3</sub>): δ 9.93 (1H, s), 9.79 (1H, s), 8.53 (1H, d, *J* = 5.0 Hz), 8.49 (1H, d, *J* = 4.6 Hz), 8.2–8.3 (2H, m), 7.89 (2H, d, *J* = 7.8 Hz), 7.73 (2H, m), 7.67 (4H, m), 7.50 (1H, m), 7.41 (1H, m), 7.3–7.2 (2H, overlapped with CHCl<sub>3</sub>), 7.13 (2H, d, *J* = 5.5 Hz), 7.1–6.85 (6H, m), 6.28 (2H, t, *J* = 6.9 Hz), 3.37 (4H, m, CH<sub>2</sub>CH<sub>2</sub>), 2.70 (3H, s, CH<sub>3</sub>), 2.44 (3H, s, CH<sub>3</sub>); ESI-HRMS (CH<sub>3</sub>CN): *m/z* calcd. for C<sub>46</sub>H<sub>38</sub>IrN<sub>6</sub><sup>+</sup> ([M-Cl]<sup>+</sup>), 867.2782; found, 867.2889.

**[Ir-L2]<sup>+</sup>**. <sup>1</sup>H-NMR (CDCl<sub>3</sub>; the integration values of 1/2 and 3/2 indicate protons of one of diastereomers; resonances not specified are of aromatic protons): δ 9.51 ((1/2)H, s), 9.45 ((1/2)H, s), 9.26 ((1/2)H, s), 9.20 ((1/2)H, s), 8.55 (1H, t, *J* = 5.0 Hz), 8.50 (1H, m), 8.23 (1H, m), 8.20 (1H, m), 7.9–7.85 (2H, m), 7.75–7.6 (6H, m), 7.55–7.4 (3H, m), 7.11 (2H, m), 7.05–6.85 (6H, m), 6.3–6.25 (2H, m), 6.07 (1H, m), 4.53 (1H, m, CHOH), 3.3–3.1 (2H, m, CH<sub>2</sub>), 3.05–2.9 (2H, m, CH<sub>2</sub>), 2.64 ((3/2)H, s, CH<sub>3</sub>), 2.63 ((3/2)H, s, CH<sub>3</sub>), 2.42 (3H, s, CH<sub>3</sub>); ESI-HRMS (CH<sub>3</sub>CN): *m/z* calcd. for C<sub>47</sub>H<sub>40</sub>IrON<sub>6</sub><sup>+</sup> ([M-Cl]<sup>+</sup>), 897.2887; found, 897.3015.

**[Ir-L3]<sup>+</sup>**. <sup>1</sup>H-NMR (CDCl<sub>3</sub>): δ 9.55 (1H, d, *J* = 8.7 Hz), 9.42 (1H, d, *J* = 8.2 Hz), 8.51 (1H, m), 8.22 (1H, d, *J* = 7.8 Hz), 8.2–8.1 (2H, m), 7.99 (1H, m), 7.82 (1H, d, *J* = 8.2 Hz), 7.75 (1H, d, *J* = 7.8 Hz), 7.65–7.55 (6H, m), 7.39 (1H, m), 7.3–7.2 (3H, overlapped with CHCl<sub>3</sub>), 7.15 (1H, m), 7.0–6.85 (6H, m), 6.22 (1H, d, *J* = 7.3 Hz), 6.07 (1H, d, *J* = 6.9 Hz), 3.0–2.8 (4H, m, CH<sub>2</sub>CH<sub>2</sub>), 2.41 (3H, s, CH<sub>3</sub>), 2.19 (3H, s, CH<sub>3</sub>); ESI MS (CH<sub>3</sub>CN): *m/z* calcd. for C<sub>46</sub>H<sub>38</sub>IrN<sub>6</sub><sup>+</sup> ([M-Cl]<sup>+</sup>), 867.2782; found, 867.2809.

**[Ir-L4]<sup>+</sup>**. <sup>1</sup>H-NMR (CDCl<sub>3</sub>): δ 9.81 (1H, d, *J* = 8.2 Hz), 9.72 (1H, d, *J* = 8.2 Hz), 8.75–8.65 (2H, m), 8.5–8.35 (3H, m), 8.25 (1H, t, *J* = 7.4 Hz), 8.0–7.75 (8H, m), 7.72 (1H, d, *J* = 6.9 Hz), 7.75–7.65 (1H, m), 7.54 (1H, d, *J* = 5.5 Hz), 7.47 (1H, d, *J* = 6.4 Hz), 7.39 (1H, m), 7.34 (1H, dd, *J* = 6.8 Hz, 5.0 Hz), 7.1–6.9 (6H, m), 6.32 (1H, d, *J* = 6.9 Hz), 6.28 (1H, d, *J* = 6.8 Hz); ESI MS ([Ir-L4]<sup>+</sup>, CH<sub>3</sub>CN): *m/z* calcd. for C<sub>44</sub>H<sub>30</sub>IrN<sub>6</sub><sup>+</sup> ([M-PF<sub>6</sub>]<sup>+</sup>), 835.2156; found, 835.2249.

**[Ir-X-Co] (X = L1, L2)**. Isolation of [Ir-X-Co] (= [(Ir-X)<sub>*n*</sub>Co]<sup>(2+*n*)<sup>+</sup>, *n* = 1, 2 and 3) is exemplified by that of [Ir-L1-Co]. To a stirred solution of [Ir-L1]<sup>+</sup> (0.010 g, 2.2 mmol) in CH<sub>3</sub>OH (10 mL), CoCl<sub>2</sub>·6(H<sub>2</sub>O) (0.89 mg, 0.75 mmol) was added at room temperature and the solution was stirred overnight. The volume of the solution was reduced and a saturated</sup>

aqueous  $\text{NH}_4\text{PF}_6$  solution was added, giving a yellow precipitate. The precipitate was filtered and washed with small amount of cold  $\text{CH}_3\text{OH}$ , followed by water and diethyl ether and dried in vacuum to give [Ir-L1-Co] as a yellow solid, 11 mg.

**[Ir-L1-Co].** ESI-HRMS ( $\text{CH}_3\text{CN}$ ):  $m/z$  calcd. for  $\text{C}_{138}\text{H}_{114}\text{N}_{18}\text{Ir}_3\text{Co}^{5+}$  ( $[\text{M}-5(\text{PF}_6)]^{5+}$ ,  $n = 3$ ), 531.9536; found, 531.9650.

**[Ir-L2-Co]<sup>5+</sup>.** ESI-HRMS ( $\text{CH}_3\text{CN}$ ):  $m/z$  calcd. for  $\text{C}_{141}\text{H}_{120}\text{N}_{18}\text{O}_3\text{Ir}_3\text{Co}^{5+}$  ( $[\text{M}-5(\text{PF}_6)]^{5+}$ ,  $n = 3$ ), 549.9599; found, 550.0667.

**Hydrogen evolution experiment.** Samples for photoinduced hydrogen production experiments were prepared in a 20-mL screw-cap glass vial with a silicone septum. Each sample was made in 10 mL  $\text{H}_2\text{O}/\text{CH}_3\text{CN}$  (1:1 v/v). Samples typically contained 15  $\mu\text{M}$  [Ir-X]<sup>+</sup> or  $[\text{Ir}(\text{ppy})_2(\text{bpy})]^+$ , 5  $\mu\text{M}$   $\text{CoCl}_2 \cdot 6(\text{H}_2\text{O})$  or  $[\text{Co}(\text{bpy})_3]^{2+}$  and 0.015 or 1.2 M TEOA. The sample vial was capped and deoxygenated by bubbling Ar gas for 30 min. The vial was then placed over a magnetic stirrer in a dark place at room temperature and illuminated with visible light. Lax-Cute light source (100, xenon light) with complete heat blocking system from Asahi Spectra USA Inc. was used to illuminate only visible light ( $\lambda = 400\text{--}700$  nm). After illumination, 1.0 mL of the gas produced in the vial was sampled using a Hamilton syringe. Gas chromatographic (GC) analysis for  $\text{H}_2$  was performed on a Shimadzu GC-8A with a 5 Å molecular sieve column (3 m length), a rhenium-tungsten thermal conductivity detector, and Ar as a carrier gas. The calibration curve was created using Ar gas samples containing varying amounts of standard  $\text{H}_2$  (99.9%, GL Sciences). Potassium ferrioxalate was used as a chemical actinometer to determine the photon flux at  $411 \pm 5$  nm (Asahi Spectra, MX0410),<sup>7</sup> which then was used for the determination of the quantum yield of  $\text{H}_2$  generation.

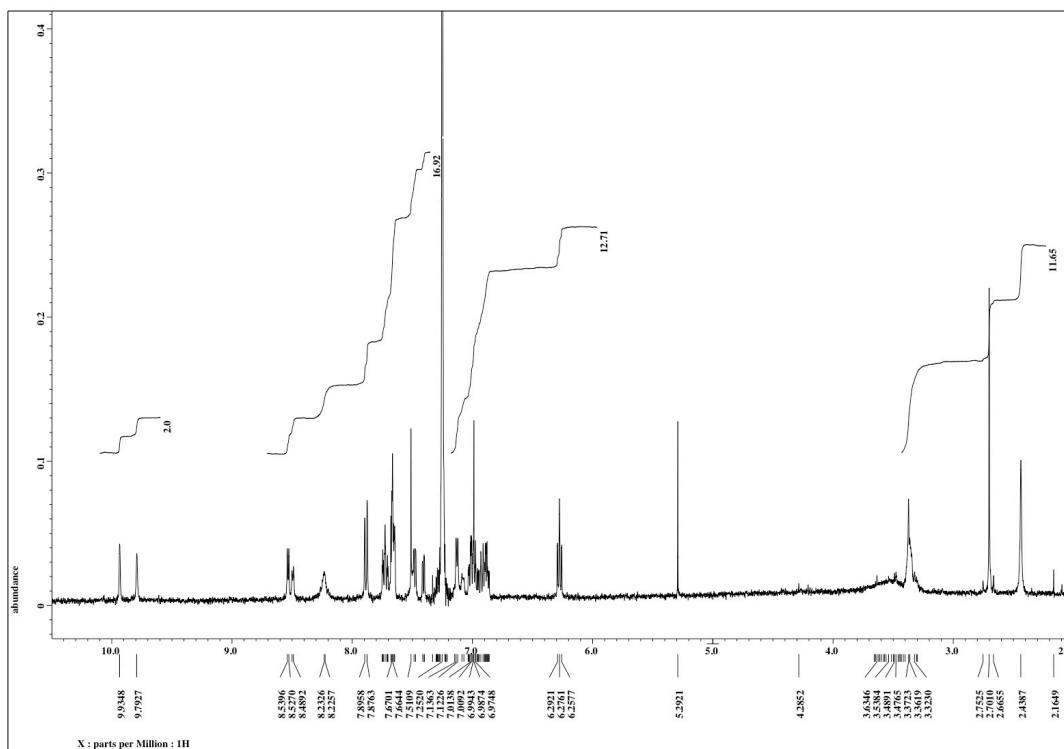

(a)

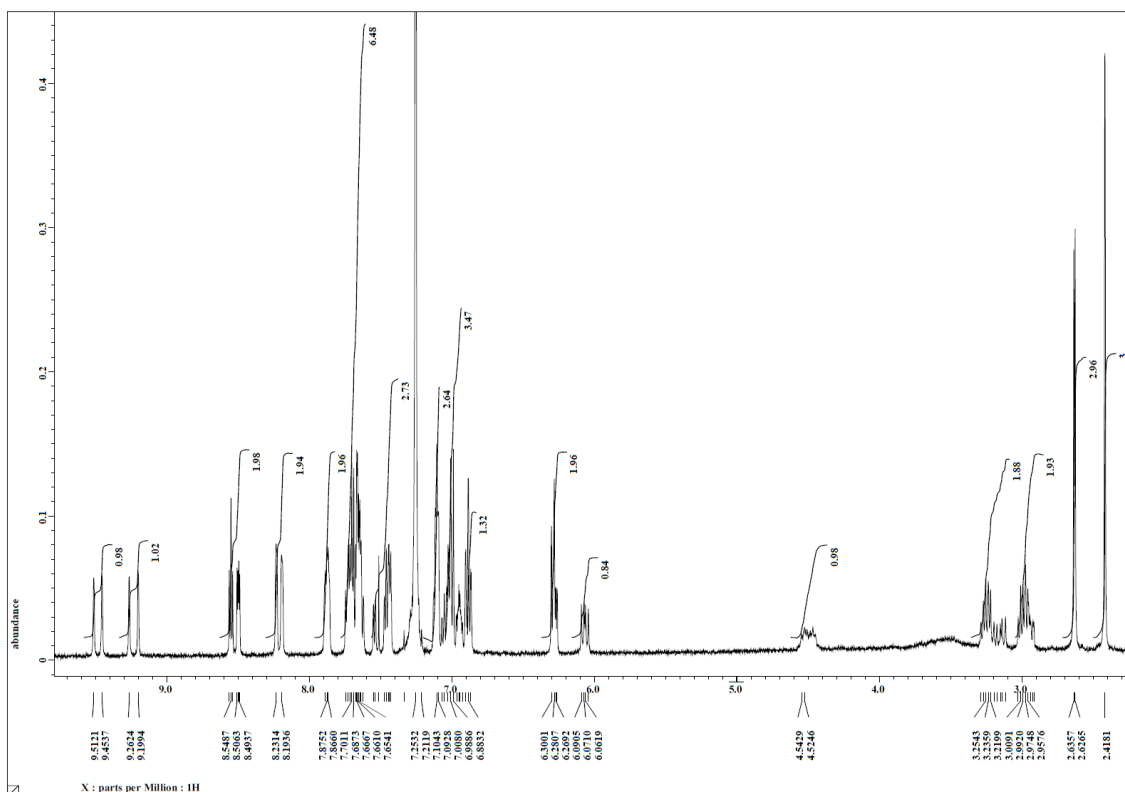

(b)

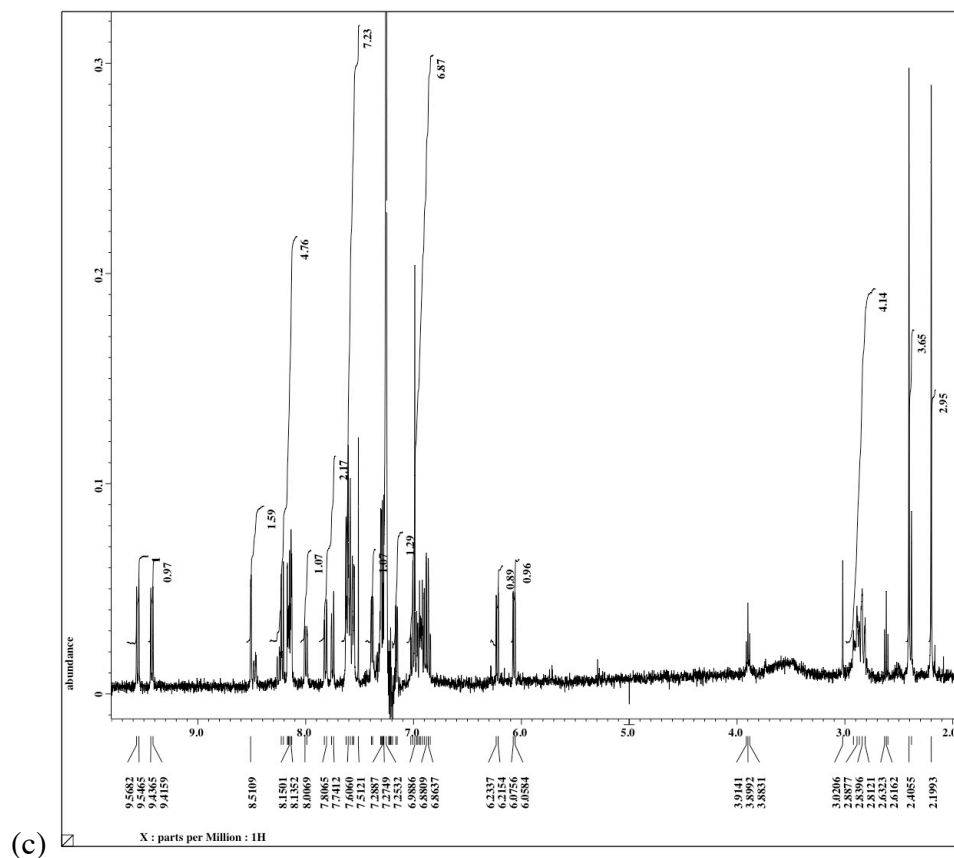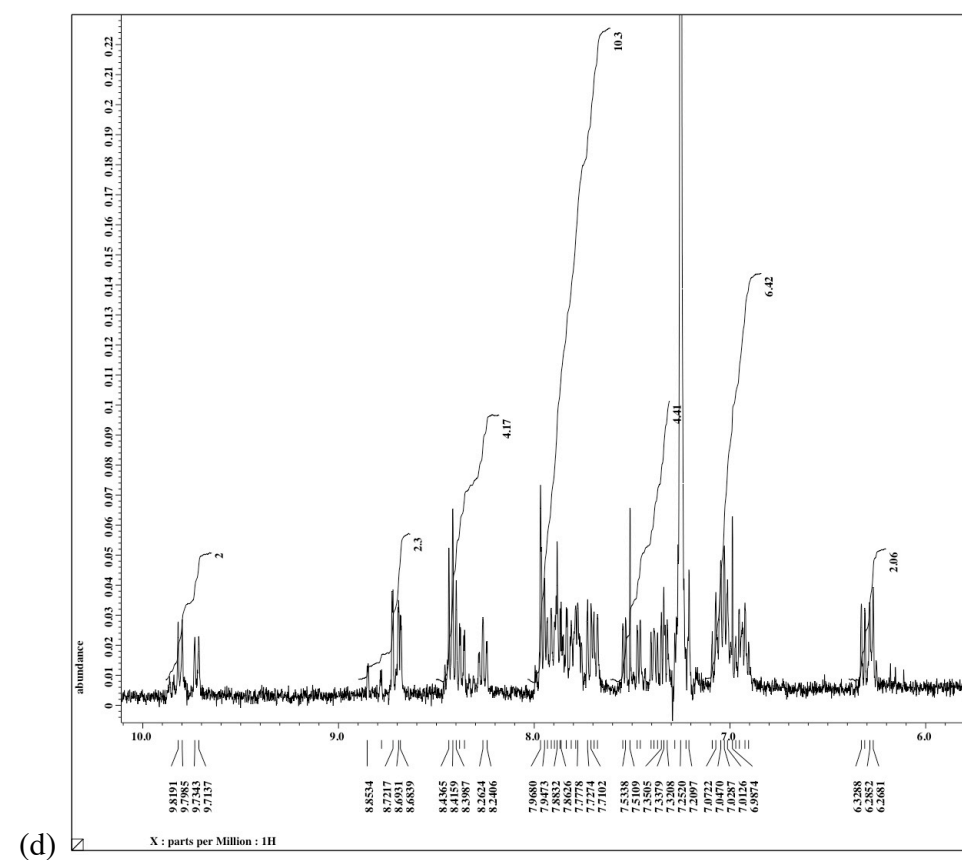

**Fig. S1**  $^1\text{H}$ -NMR spectra in  $\text{CDCl}_3$ . (a)  $[\text{Ir-L1}]^+$ . (b)  $[\text{Ir-L2}]^+$ . (c)  $[\text{Ir-L3}]^+$ . (d)  $[\text{Ir-L4}]^+$ .

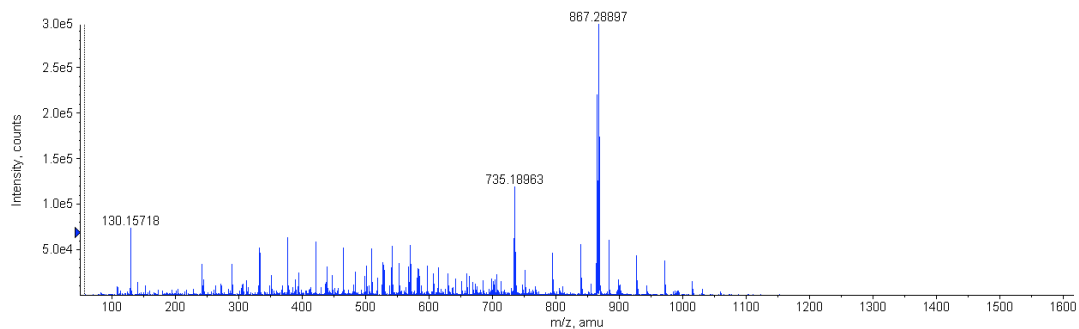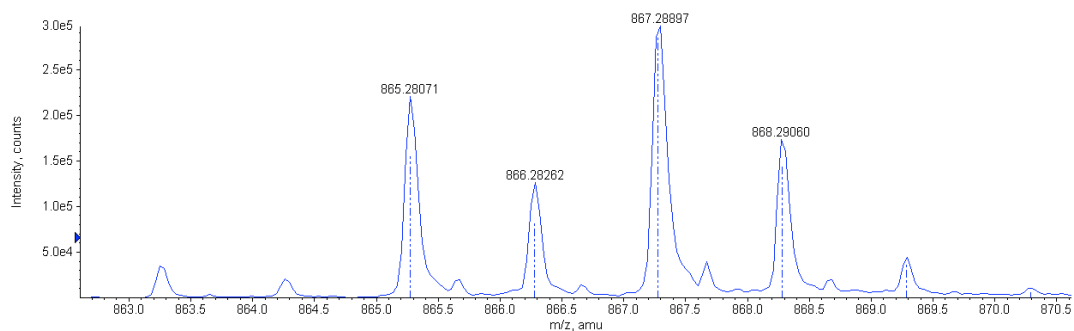

(a)

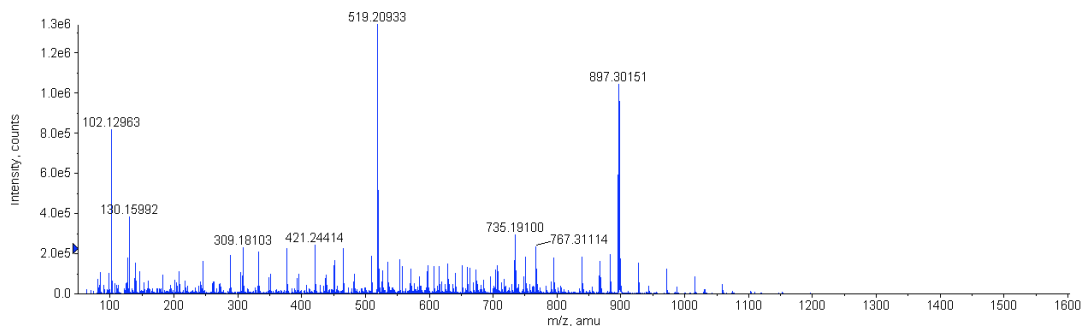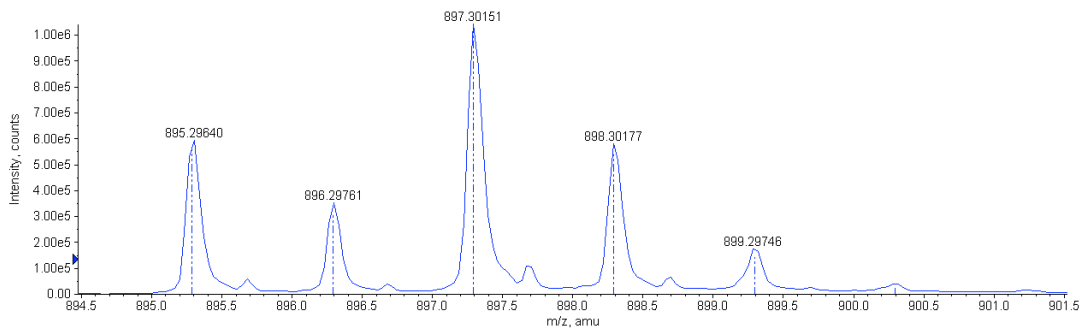

(b)

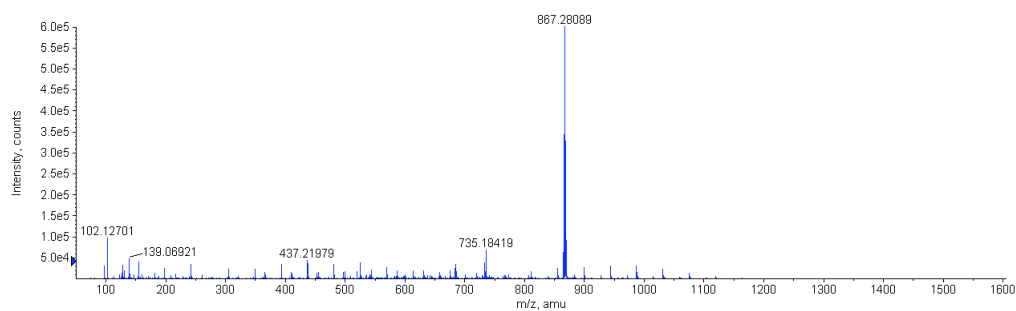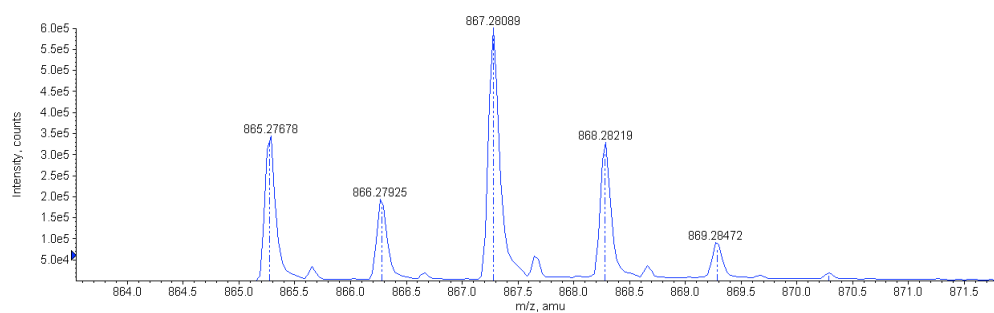

(c)

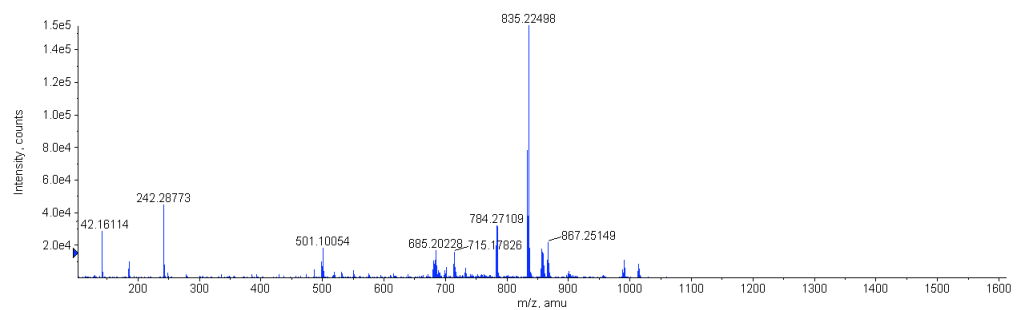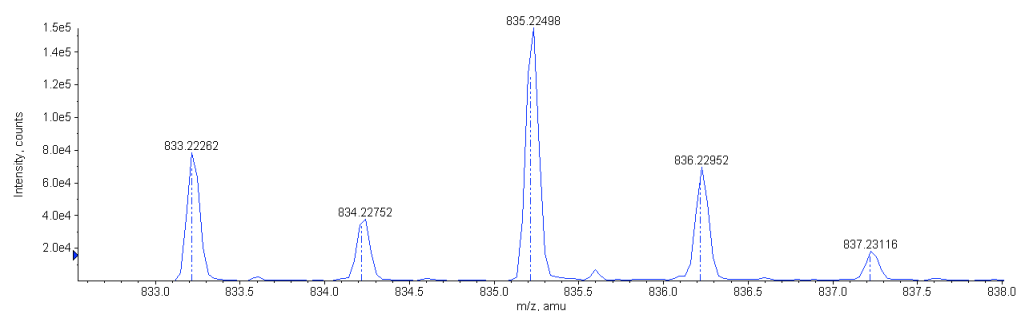

(d)

**Fig. S2** ESI-HRMS spectra. CH<sub>3</sub>CN was used as solvent. (a) [Ir-L1]<sup>+</sup>. (b) [Ir-L2]<sup>+</sup>. (c) [Ir-L3]<sup>+</sup>. (d) [Ir-L4]<sup>+</sup>.

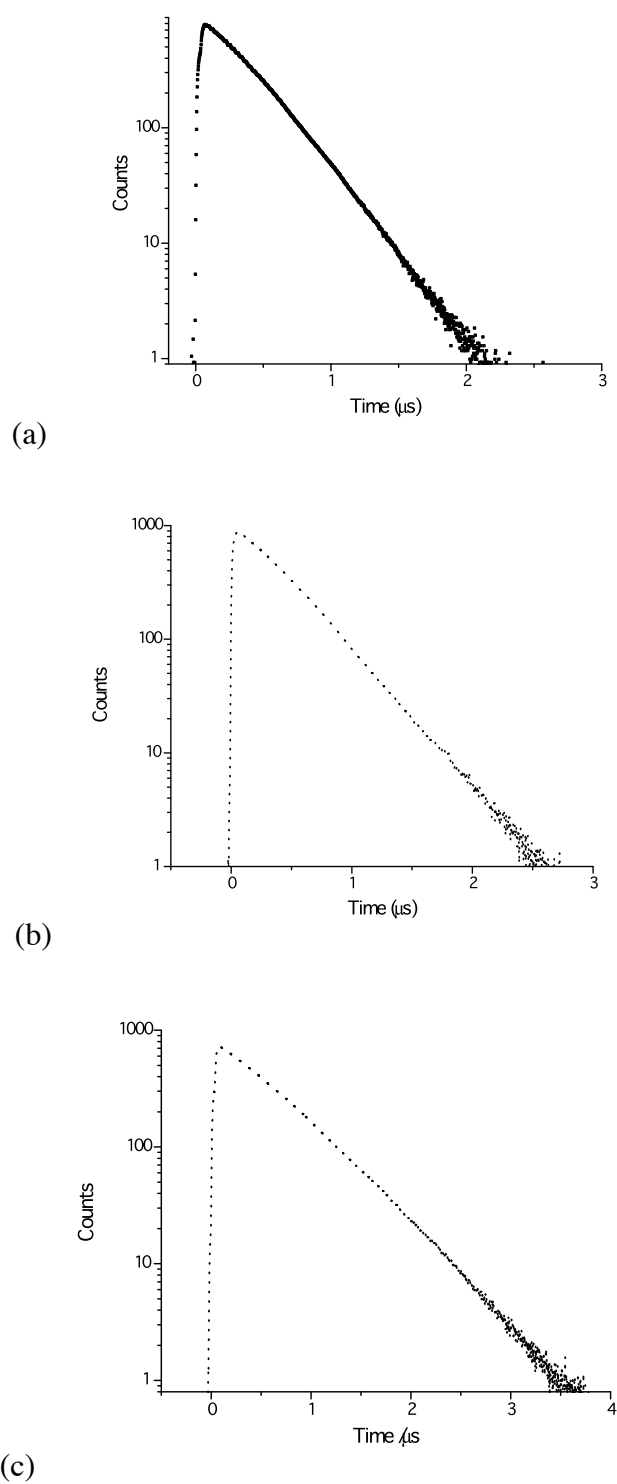

**Fig. S3** Single exponential luminescence decay (logarithmic plot) for 6  $\mu\text{M}$   $[\text{Ir-X}]^+$  in Ar degassed  $\text{CH}_3\text{OH}$ . (a)  $[\text{Ir-L1}]^+$ . (b)  $[\text{Ir-L2}]^+$ . (c)  $[\text{Ir-L3}]^+$ .



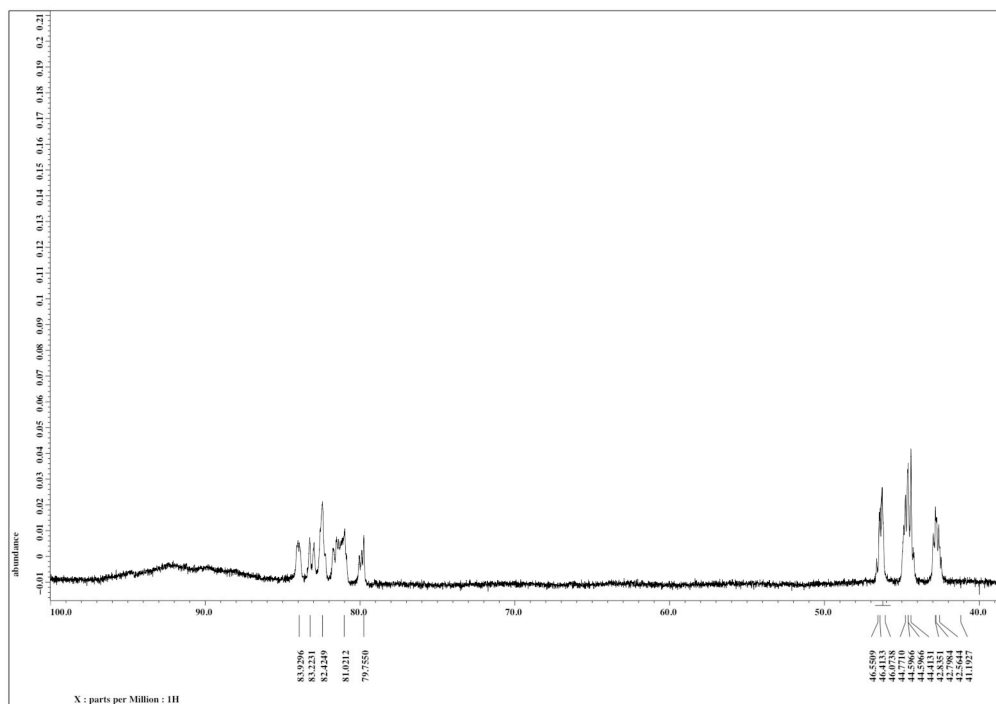

(a)

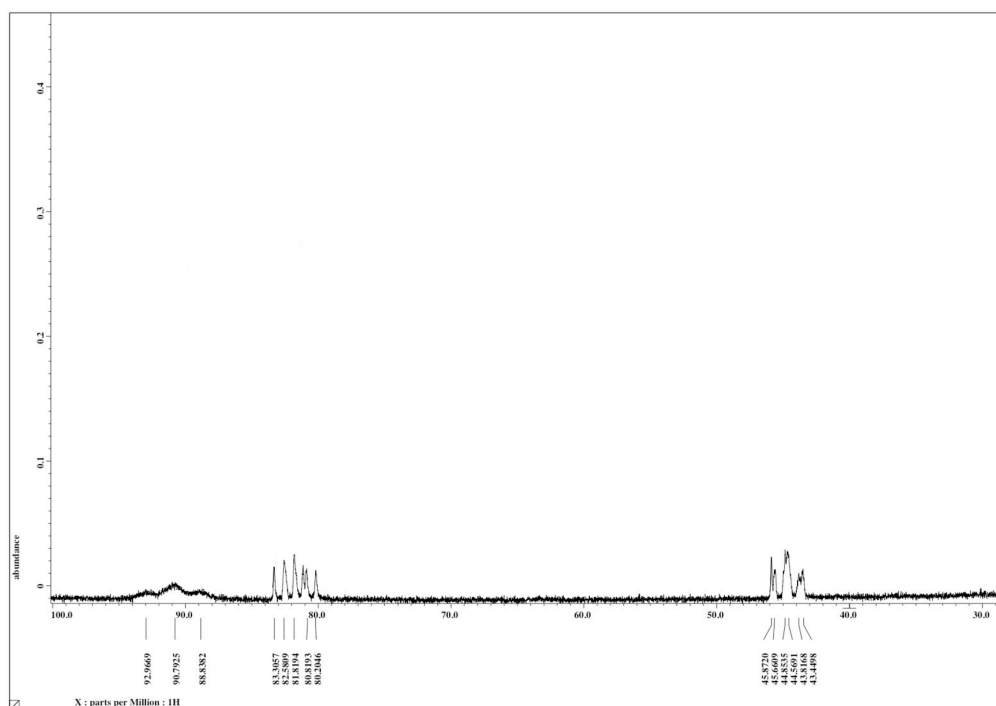

(b)

**Fig. S4** <sup>1</sup>H-NMR spectra in CD<sub>3</sub>CN for supramolecular complexes isolated as PF<sub>6</sub><sup>-</sup> salt. (a) [Ir-L1-Co]. (b) [Ir-L2-Co].

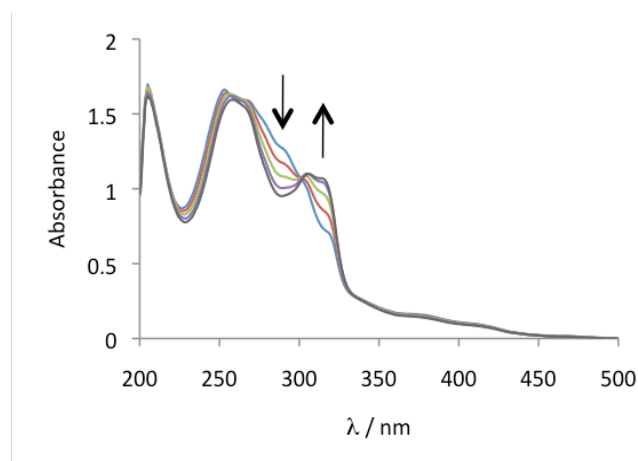

**Fig. S5** Uv-visible absorption spectrophotometric titration spectra of  $[\text{Ir-L3}]^+$  ( $30 \mu\text{M}$ ) with  $\text{CoSO}_4 \cdot 7(\text{H}_2\text{O})$  ( $0\text{--}35 \mu\text{M}$ ) in  $\text{CH}_3\text{OH}$ . Isosbestic point at  $305 \text{ nm}$  is observed, even though sequential binding of  $[\text{Ir-L3}]^+$  and  $\text{Co}^{2+}$  is expected, which suggests the absorption spectra for  $[(\text{bpy})_n\text{Co}]^{2+}$  are similar around  $305 \text{ nm}$ , irrespective of  $n$ .

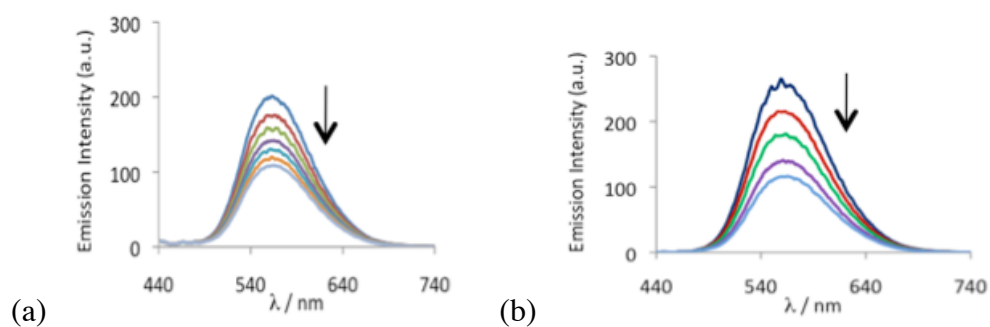

**Fig. S6** Emission quenching with  $\text{CoCl}_2$  in Ar degassed  $\text{H}_2\text{O}/\text{CH}_3\text{CN}$  ( $1:1 \text{ v/v}$ ).  $\lambda_{\text{ex}} = 420 \text{ nm}$ .  
(a)  $[\text{Ir-L1}]^+$ ;  $0\text{--}13.3 \mu\text{M}$ . (b)  $[\text{Ir-L2}]^+$ ;  $0\text{--}9.4 \mu\text{M}$ .

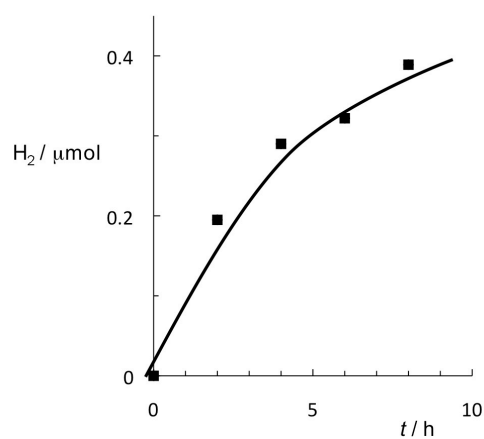

**Fig. S7** Photochemical H<sub>2</sub> production from H<sub>2</sub>O/CH<sub>3</sub>CN (1:1 v/v) (10 mL) containing 15 mM TEOA, 15 μM [Ir-L2]<sup>+</sup> and 5 μM CoCl<sub>2</sub> at room temperature under Ar atmosphere.

## Quantitative Estimation of Excited State Processes

**The energy of the excited state.** The energy of the excited state of  $[\text{Ir-L1}]^+$  ( $E_{00}$ ) is estimated using eq. S1:<sup>8</sup>

$$E_{00} = E_0 + (\text{FWHM})^2 / (16 k_B T \ln 2). \quad (\text{S1})$$

Here,  $E_0$  and FWHM are the energy of the emission maximum and the full width at half maximum in an energy scale, respectively, for the emission band,  $k_B$  is the Boltzmann constant and  $T$  the temperature. Putting in specific values,  $E_{00}$  is obtained as:

$$\begin{aligned} E_{00} &= 2.21 \text{ eV} + (0.275 \text{ eV})^2 / (16 \times 8.63 \times 10^{-5} \text{ eV K}^{-1} \times 298 \text{ K} \times \ln 2) \\ &= 2.48 \text{ eV}. \end{aligned}$$

**The driving force of the oxidative and reductive quenching.** The oxidative quenching represented by reaction S2 and the reductive quenching by reaction S3 might be possible quenching mechanisms of  $*[\text{Ir-L1}]^+$  by electron transfer:

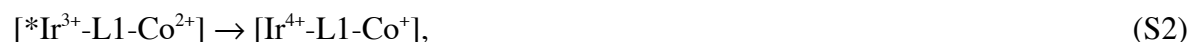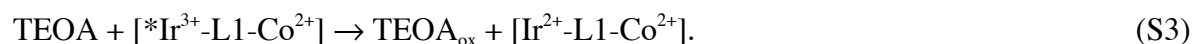

The energetics for these processes are depicted in Fig. S8. The driving force for reaction S2,  $\Delta G_{\text{S2}}$ , is, assuming a  $[\text{Co}(\text{bpy})_3]^{2+}$ -type complex as the Co(II) species:

$$\begin{aligned} \Delta G_{\text{S2}} &= e E([\text{Ir-L1}]^{2+/+}) - E_{00} - e E([\text{Co}(\text{bpy})_3]^{2+/+}) \\ &= +0.89 \text{ eV} - 2.48 \text{ eV} - (-1.33 \text{ eV}) = -0.26 \text{ eV}. \end{aligned}$$

The driving forces of reductive quenching by less coordinated Co(II) species,  $[\text{Co}(\text{bpy})_2]^{2+}$  and  $[\text{Co}(\text{bpy})]^{2+}$ , would be progressively less exoergonic by ca. 0.15 V per one less bpy lignd.<sup>9</sup>

The driving force for the reductive quenching, reaction S3,  $\Delta G_{\text{S3}}$ , is:

$$\begin{aligned} \Delta G_{\text{S3}} &= -e E([\text{Ir-L1}]^{+/0}) - E_{00} + e E([\text{TEOA}_{\text{ox}}/\text{TEOA}]) \\ &= -(-1.88 \text{ eV}) - 2.48 \text{ eV} + 0.33 \text{ eV} = -0.27 \text{ eV}. \end{aligned}$$

Thus, both processes, eqs. S2 and S3, are energetically feasible.

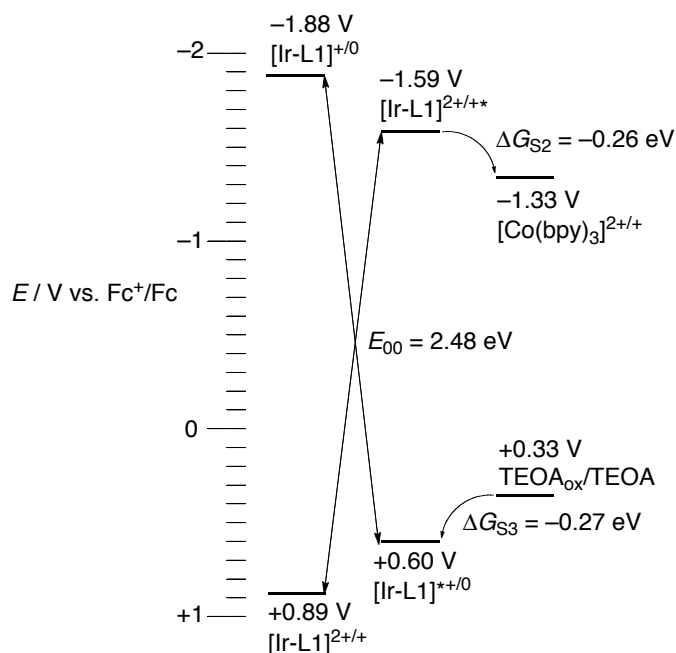

**Fig. S8** Energetic relationship. Potentials are given in V with respect to  $\text{Fc}^+/\text{Fc}$ . The oxidation potential of TEOA is taken from the literature.<sup>10</sup> The value with respect to SCE has been converted to that with respect to  $\text{Fc}^+/\text{Fc}$  using the relationship,  $E(\text{Fc}^+/\text{Fc}) = +0.40 \text{ V vs. SCE}$ .<sup>11</sup>

**Excited Energy Transfer via the Förster Mechanism.** Another process that has to be taken into account is intraensemble energy transfer, generically represented as eq. S4:

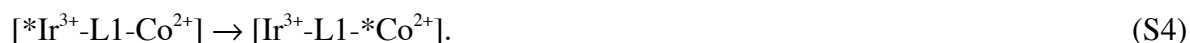

The energy transfer via the Förster mechanism is formulated as eq. S5:<sup>12</sup>

$$k_F = 8.80 \times 10^{-11} \frac{K^2 \phi_D (J_F / \text{M}^{-1} \text{cm}^{-1} \text{nm}^4)}{n_s^4 (\tau_D / \text{s}) (r / \text{nm})^6} \text{s}^{-1}. \quad (\text{S5})$$

Here,  $\phi_D$  and  $\tau_D$  are the quantum yield of the emission and the excited state lifetime, respectively, of the donor in the absence of a quencher.  $K$  is an orientation factor,  $n_s$  is the refractive index of the solvent and  $r$  is the donor–acceptor separation.  $J_F$  represents the overlap of the donor emission and acceptor absorption and is defined as in eq. S6:

$$J_F = \frac{\int F_D(\lambda) \epsilon_A(\lambda) \lambda^4 d\lambda}{\int F_D(\lambda) d\lambda}. \quad (\text{S6})$$

Here,  $F_D(\lambda)$  and  $\epsilon_A$  are the emission spectrum of the donor and the molar absorption coefficient as functions of wavelength,  $\lambda$ .

We have assumed  $K^2 = 2/3$ , a value for random orientation, considering roughly spherical Ir(III) and Co(II) complexes and the flexibility of the linker unit,  $-\text{CH}_2\text{CH}_2-$ . The quantum

yield is estimated as  $\phi_D = 0.13$  on the basis of the relative luminescence intensity as compared to that of  $[\text{Ir}(\text{ppy})_2(\text{bpy})]^+$  (0.06).<sup>13</sup> The refractive index of  $\text{H}_2\text{O}/\text{CH}_3\text{CN}$  is taken to be  $n_s = 1.34$ . The centre-to-centre distance may be around  $r = 0.8$  nm, as the crystal structure of a dinuclear metal complex bearing the same bridging ligand shows,<sup>14</sup> although the distance may vary due to the flexibility of the linker unit. The excited state lifetime of  $[\text{Ir-L1}]^+$  was experimentally obtained as  $\tau_D = 353 \times 10^{-9}$  s (in  $\text{CH}_3\text{OH}$ ). Although  $[\text{Co}(\text{bpy})_3]^{2+}$  is almost transparent in the visible region, weak d-d absorption bands ( $\epsilon \leq 50 \text{ M}^{-1} \text{ cm}^{-1}$ ) appear in a region that overlaps the luminescence of  $[\text{Ir-L1}]^+$  (Fig. S9).<sup>15</sup> The value for  $J_F$  was obtained for  $[\text{Co}(\text{bpy})_3]^{2+}$  as  $8.61 \times 10^{11} \text{ M}^{-1} \text{ cm}^{-1} \text{ nm}^4$ . Putting these values into eq. S4 gives the rate constant of the Förster energy transfer as  $k_F = 2.2 \times 10^7 \text{ s}^{-1}$ . This value is larger than the decay rate constant ( $\tau_D^{-1} = 2.8 \times 10^6 \text{ s}^{-1}$ ) in the absence of quenching processes, which means that the energy transfer can be a quite efficient process following the excited state ( $[\text{Ir}^*\text{-L1-Co}]$ ) formation. Furthermore, once the cobalt(II) is reduced to cobalt(I), the visible absorption increases nearly three orders of magnitude, which should make the energy transfer process quite efficient.

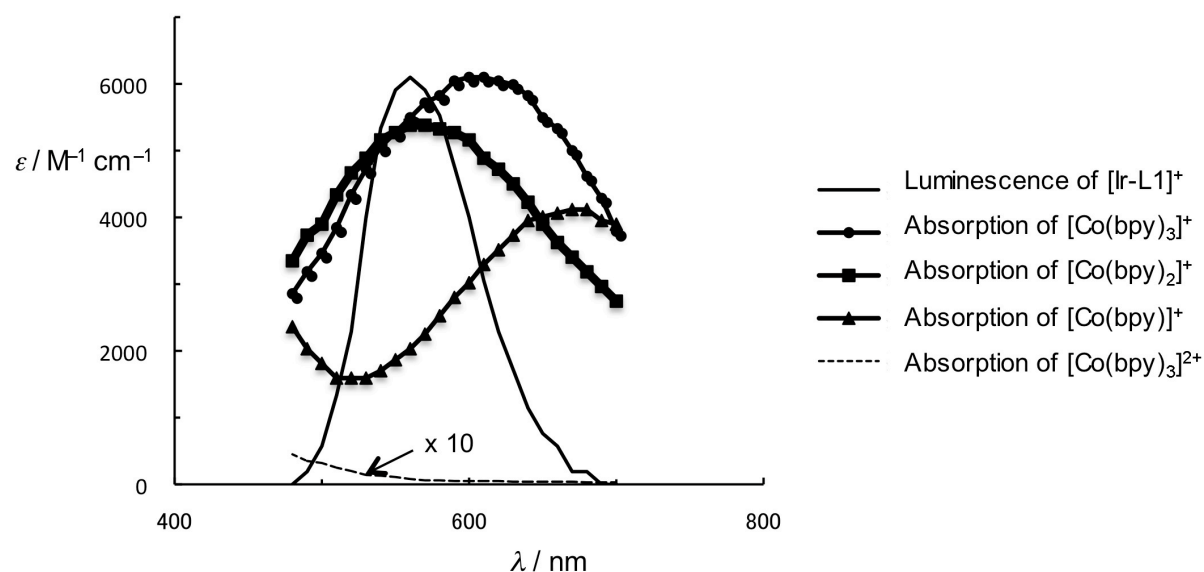

**Fig. S9** Overlap of the luminescence from  $^*[\text{Ir-L1}]^+$  and the absorption of Co(II) species. The luminescence magnitude is arbitrary. Absorption data are taken from the literature.<sup>9,15</sup>

## References

1. (a) S. Sprouse, K. A. King, P. J. Spellane and R. J. Watts, *J. Am. Chem. Soc.*, 1984, **106**, 6647–6653; (b) M. S. Lowry, W. R. Hudson, J. Robert A. Pascal and S. Bernhard, *J. Am. Chem. Soc.*, 2004, **126**, 14129–14135.

2. Y. Ohsawa, S. Sprouse, K. A. King, M. D. DeArmond, K. W. Hanck and R. J. Watts, *J. Phys. Chem.*, 1987, **91**, 1047–1054.
3. H. Nusbaumer, S. M. Zakeeruddin, J.-E. Moser and M. Grätzel, *Chem. Eur. J.*, 2003, **9**, 3756–3763.
4. (a) L. Sun, H. Berglund, R. Davydov, T. Norrby, L. Hammarström, P. Korall, A. Börje, C. Philouze, K. Berg, A. Tran, M. Andersson, G. Stenhagen, J. Mårtensson, M. Almgren, S. Styring and B. Åkermark, *J. Am. Chem. Soc.*, 1997, **119**, 6996–7004; (b) J.-C. Lepretre, B. Bar, J. Chauvin, A. Deronzier and B. Lefebvre, *Inorg. Chem. Commun.*, 2004, **7**, 47–50.
5. M. Furue, T. Yoshidzumi, S. Kinoshita, T. Kushida, S.-i. Nozakura and M. Kamachi, *Bull. Chem. Soc. Jpn.*, 1991, **64**, 1632–1640.
6. (a) Y.-Q. Fang and G. S. Hanan, 2003, 852–854; (b) R. Ziessel, J. Suffert and M.-T. Youinou, *J. Org. Chem.*, 1996, **61**, 6535–6546; (c) V. Grosshenny, F. M. Romero and R. Ziessel, *J. Org. Chem.*, 1997, **62**, 1491–1500.
7. C. G. Hatchard and C. A. Parker, *Proc. R. Soc. Lond. A*, 1956, **235**, 518–536.
8. K. A. Opperman, S. L. Mecklengurg and T. J. Meyer, *Inorg. Chem.*, 1994, **33**, 5295–5301.
9. H. A. Schwarz, C. Creutz and N. Sutin, *Inorg. Chem.*, 1985, **24**, 433–439.
10. K. Kasuga, H. Miyasaka, M. Handa and M. Dairaku, *Polyhedron*, 1995, **14**, 1675–1679.
11. N. G. Connelly and W. E. Geiger, *Chem. Rev.*, 1996, **96**, 877–910.
12. (a) J. Otsuki, *J. Porphyrins Phthalocyanines*, 2009, **13**, 1069–1081; (b) P. Klán and J. Wirz, *Photochemistry of Organic Compounds*, Wiley, West Sussex, 2009; (c) S. E. Braslavsky, E. Fron, H. B. Rodríguez, E. S. Román, G. D. Scholes, G. Schweitzer, B. Valeur and J. Wirz, *Photochem. Photobiol. Sci.*, 2008, **7**, 1444–1448.
13. J. I. Kim, I.-S. Shin, H. Kim and J.-K. Lee, *J. Am. Chem. Soc.*, 2005, **127**, 1614–1615.
14. S. Ferrerei and C. M. Elliott, *Inorg. Chem.*, 1995, **34**, 5818–5824.
15. Y. Sasaki, *Bull. Inst. Chem. Res. Kyoto Univ.*, 1980, **58**, 187–192.
